# Supplementary material
Source: PubMed Central journal article supplement (PMC3100185)

***Diastereoselective Nitrenium Ion-Mediated  
Alkene Bis-Cyclofunctionalization  
Total Synthesis of (-)-Swainsonine***

*Duncan J. Wardrop\* and Edward G. Bowen*

Department of Chemistry, University of Illinois at Chicago,  
845 West Taylor Street, Chicago, IL 60607-7061.

***Supporting Information, Part 2***

\* Corresponding author:  
Tel: 312-355-1035  
Fax: 312-996-0431  
E-mail: wardropd@uic.edu

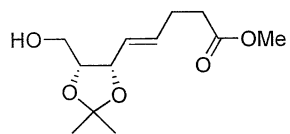

9

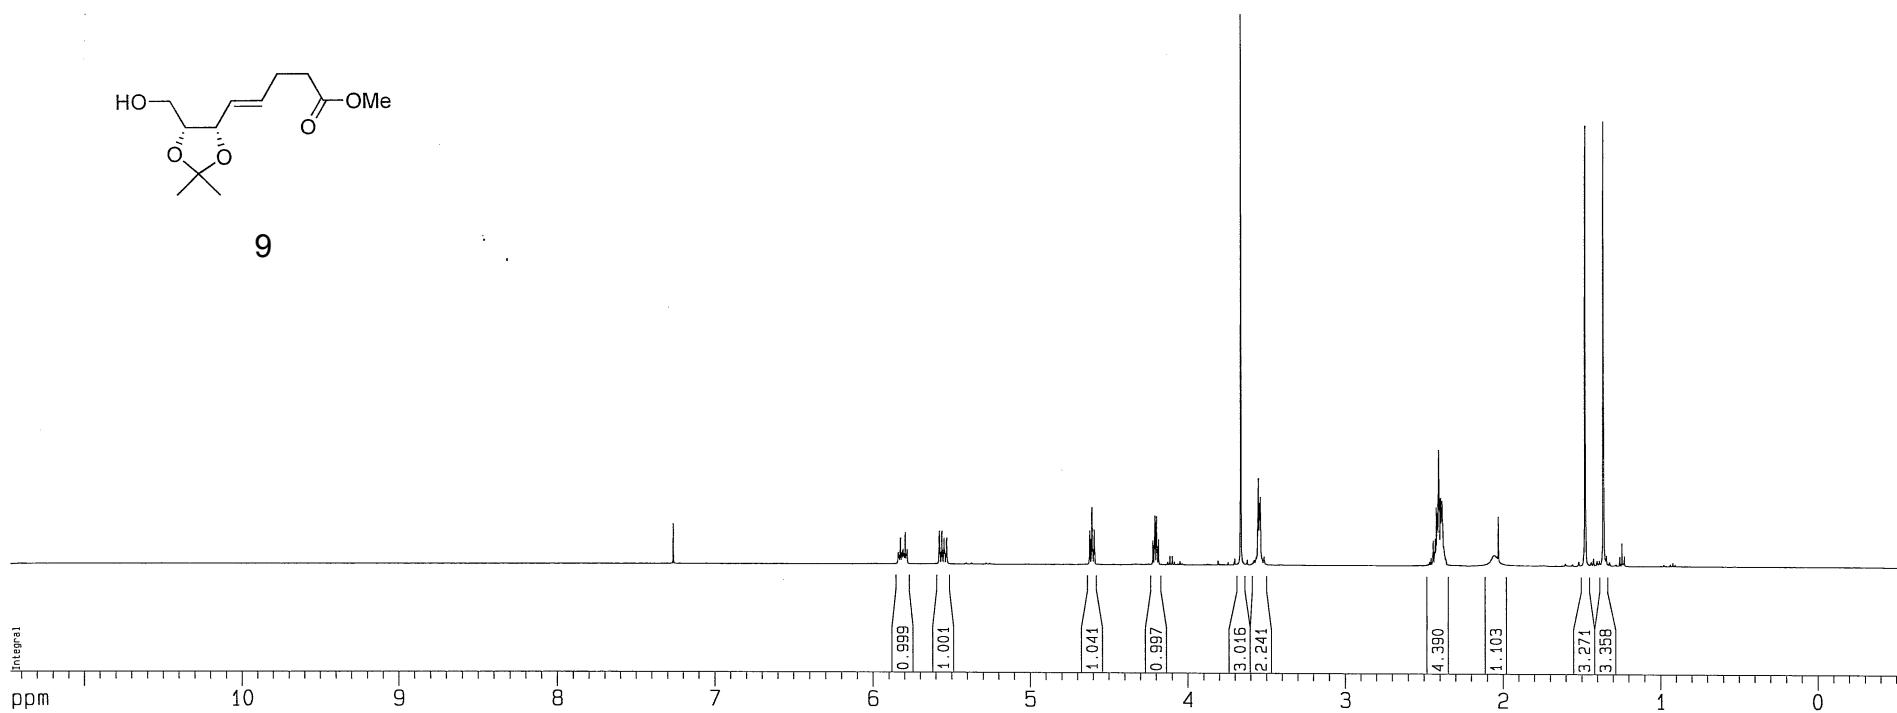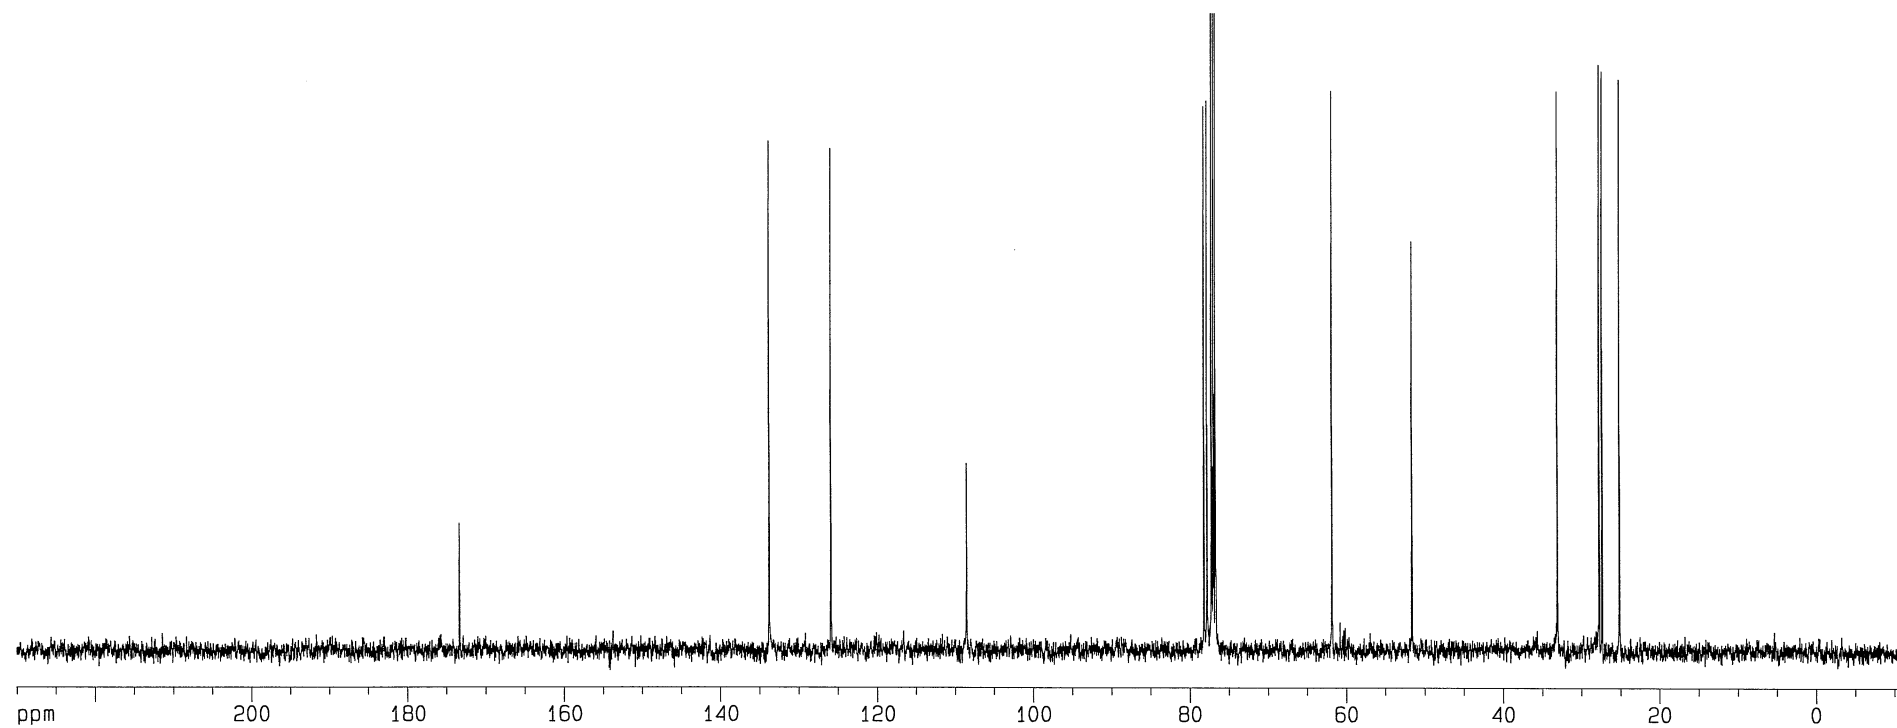

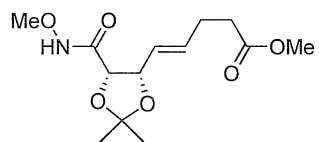

6

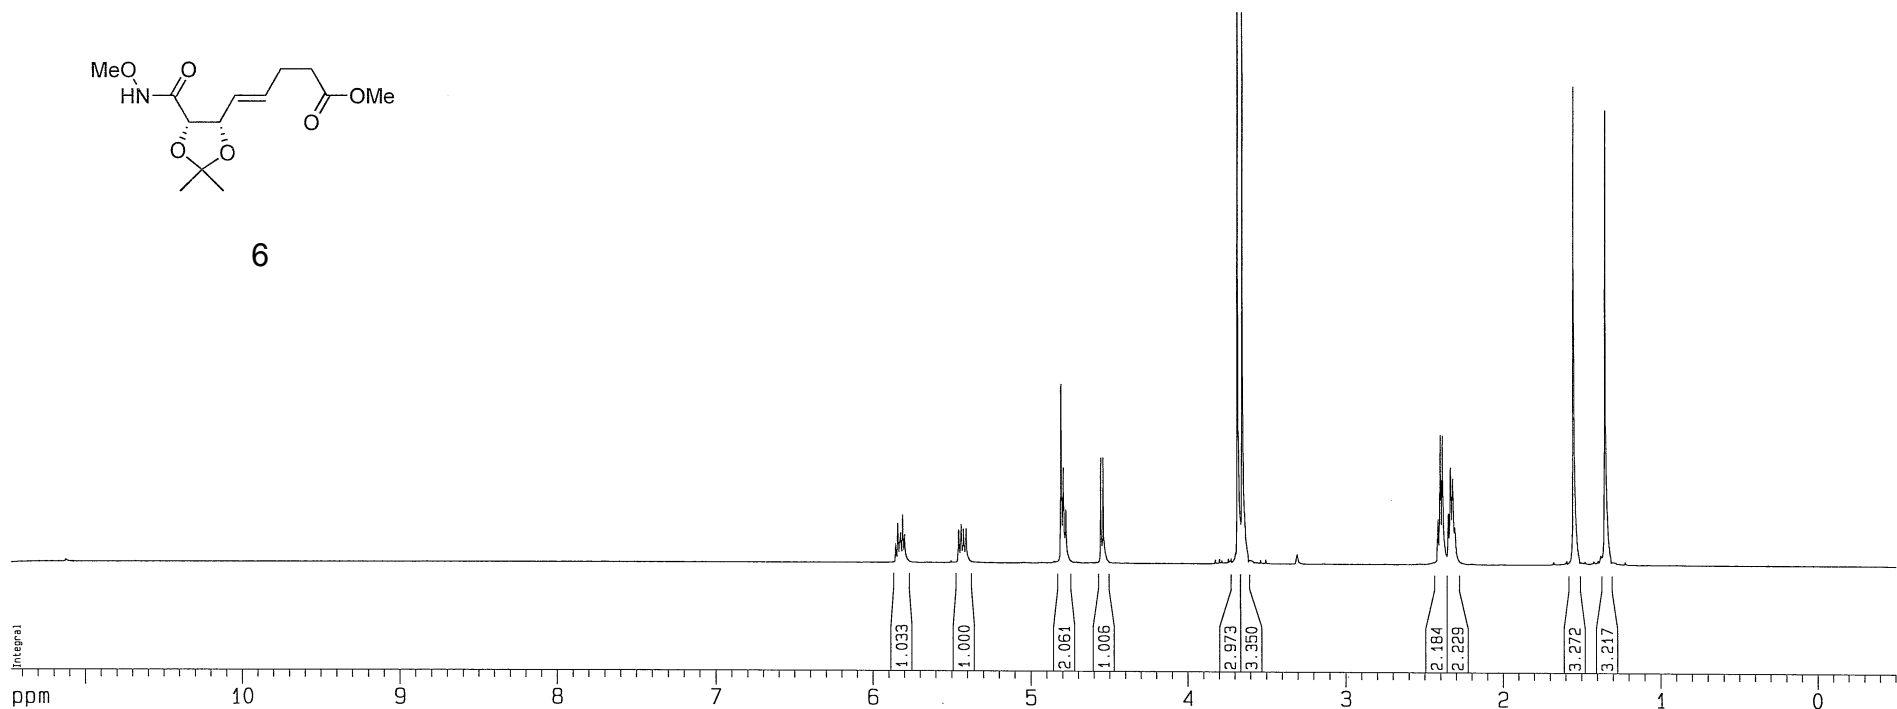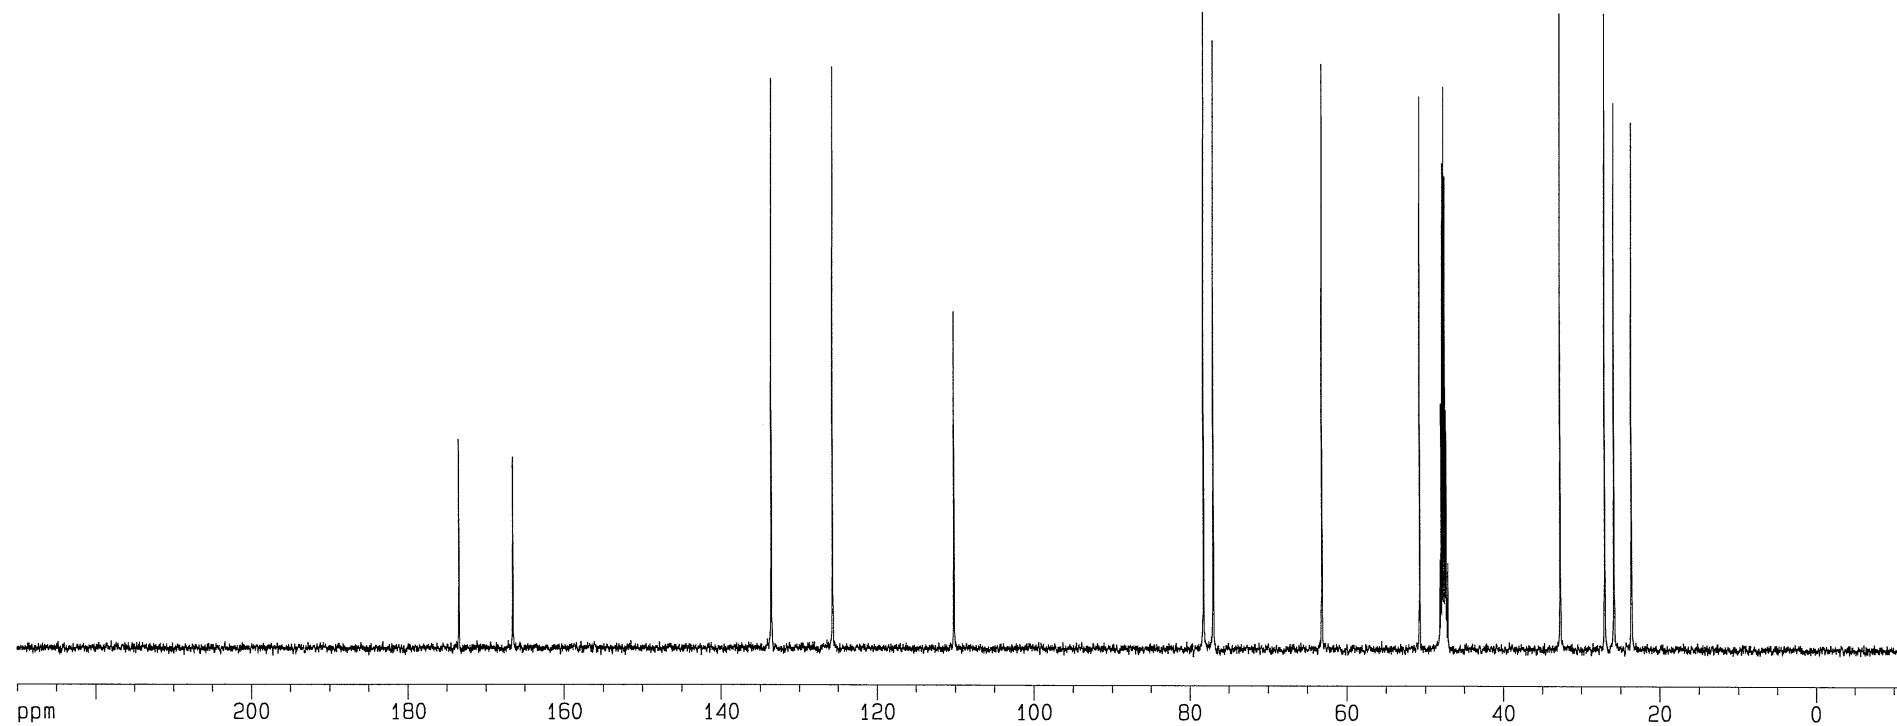

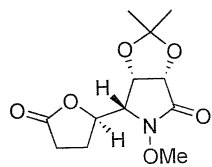

12

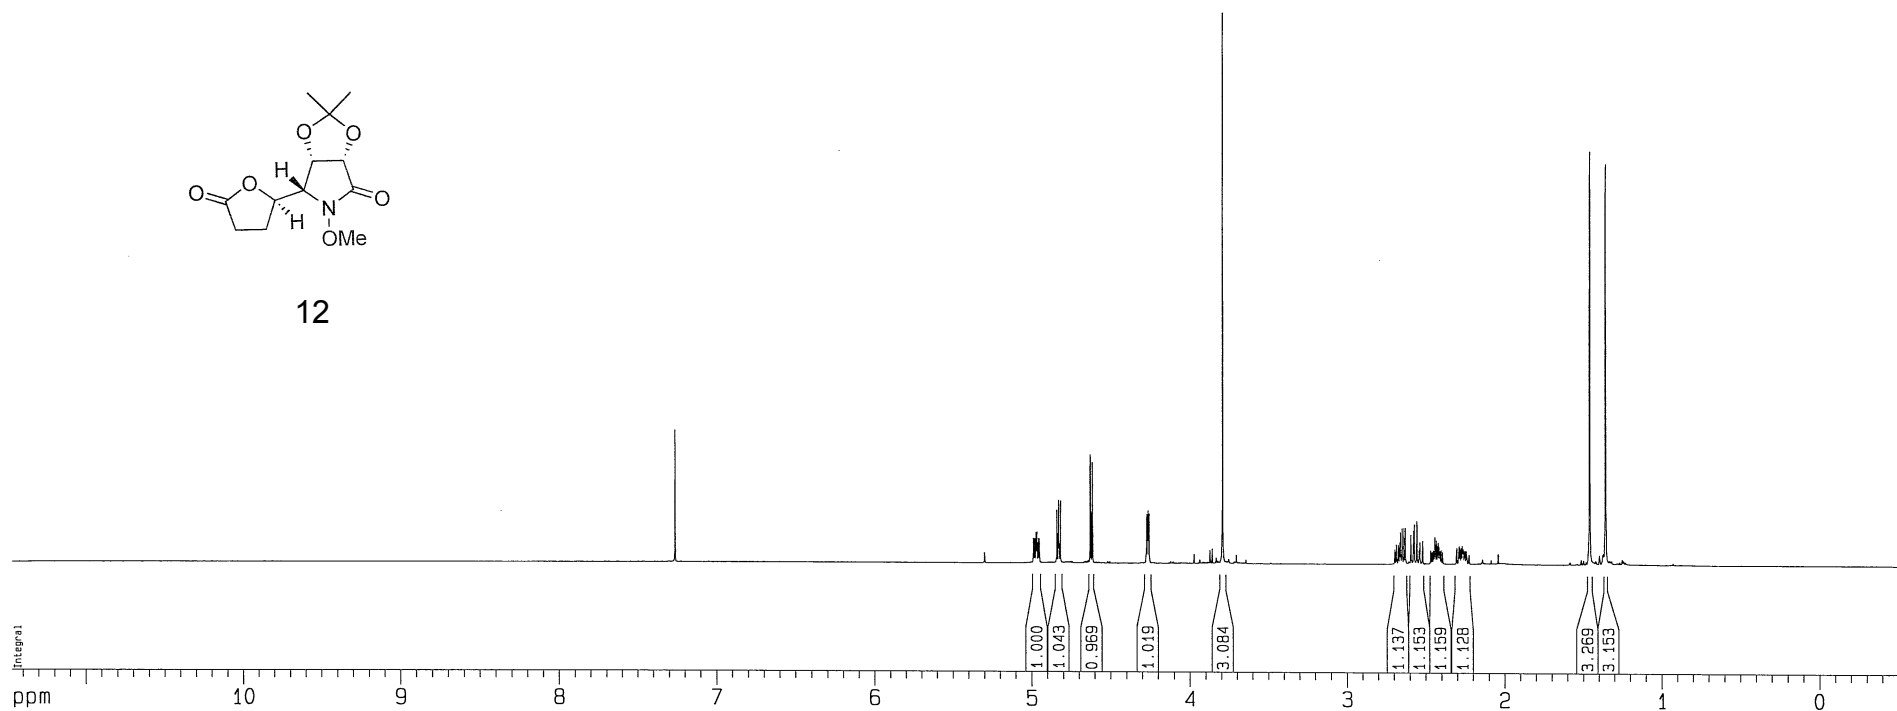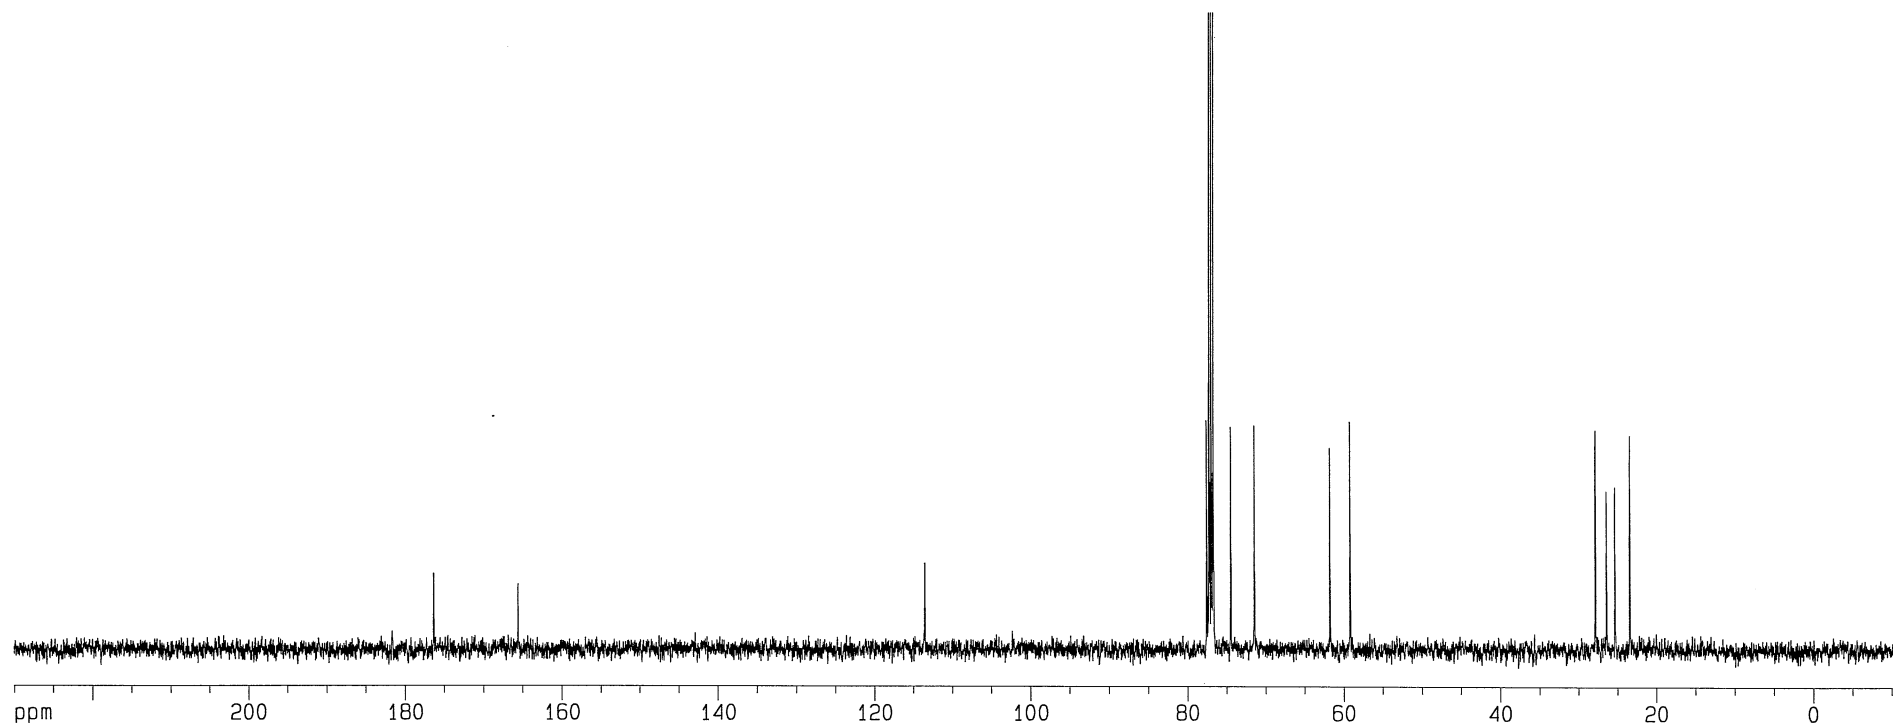

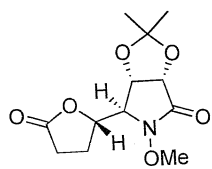

13

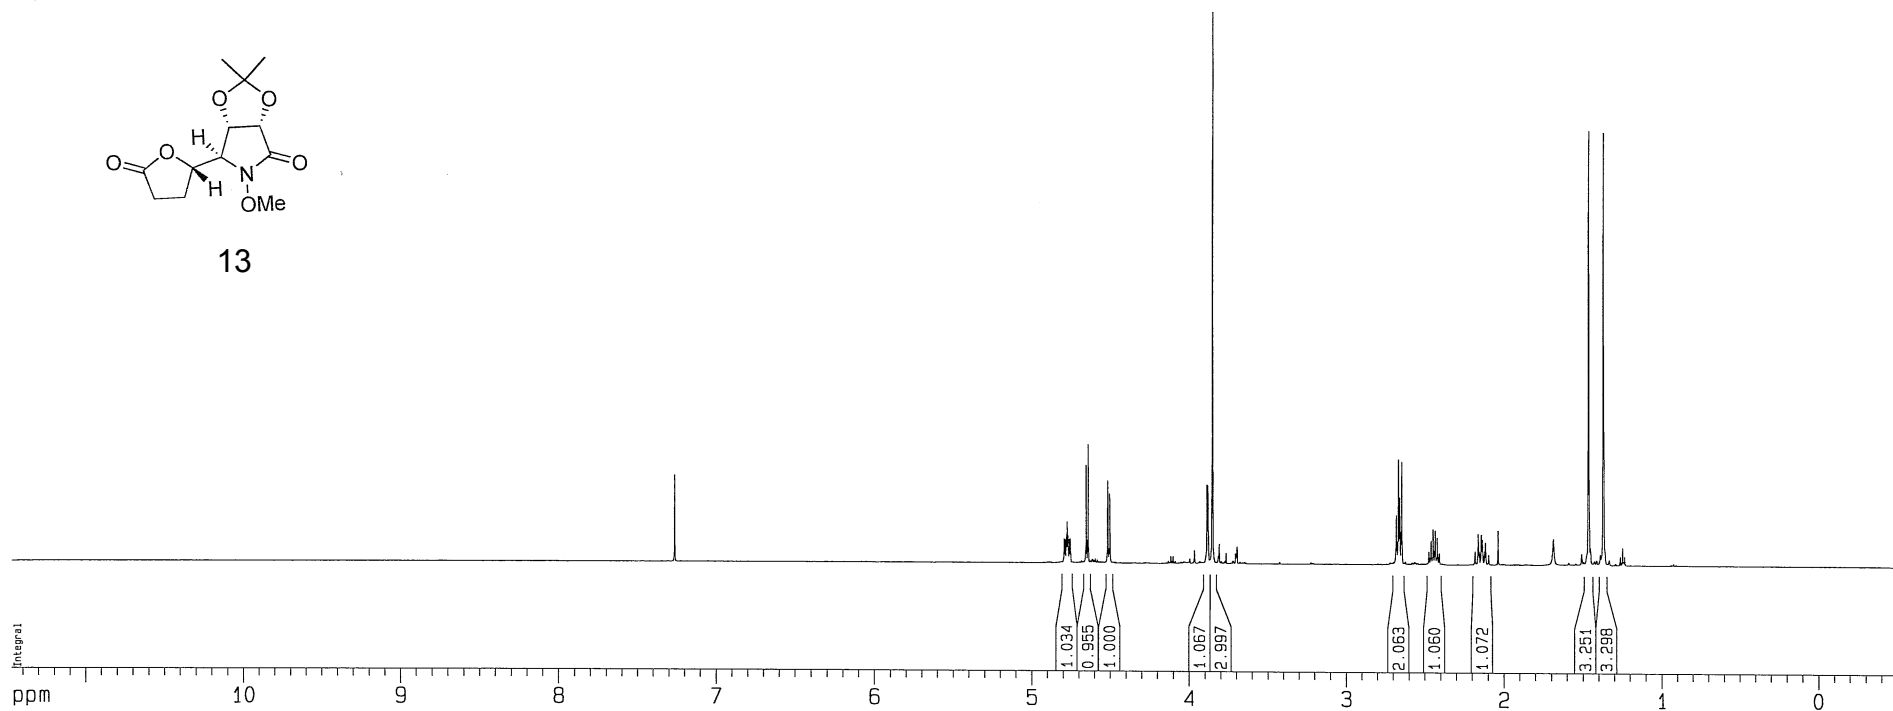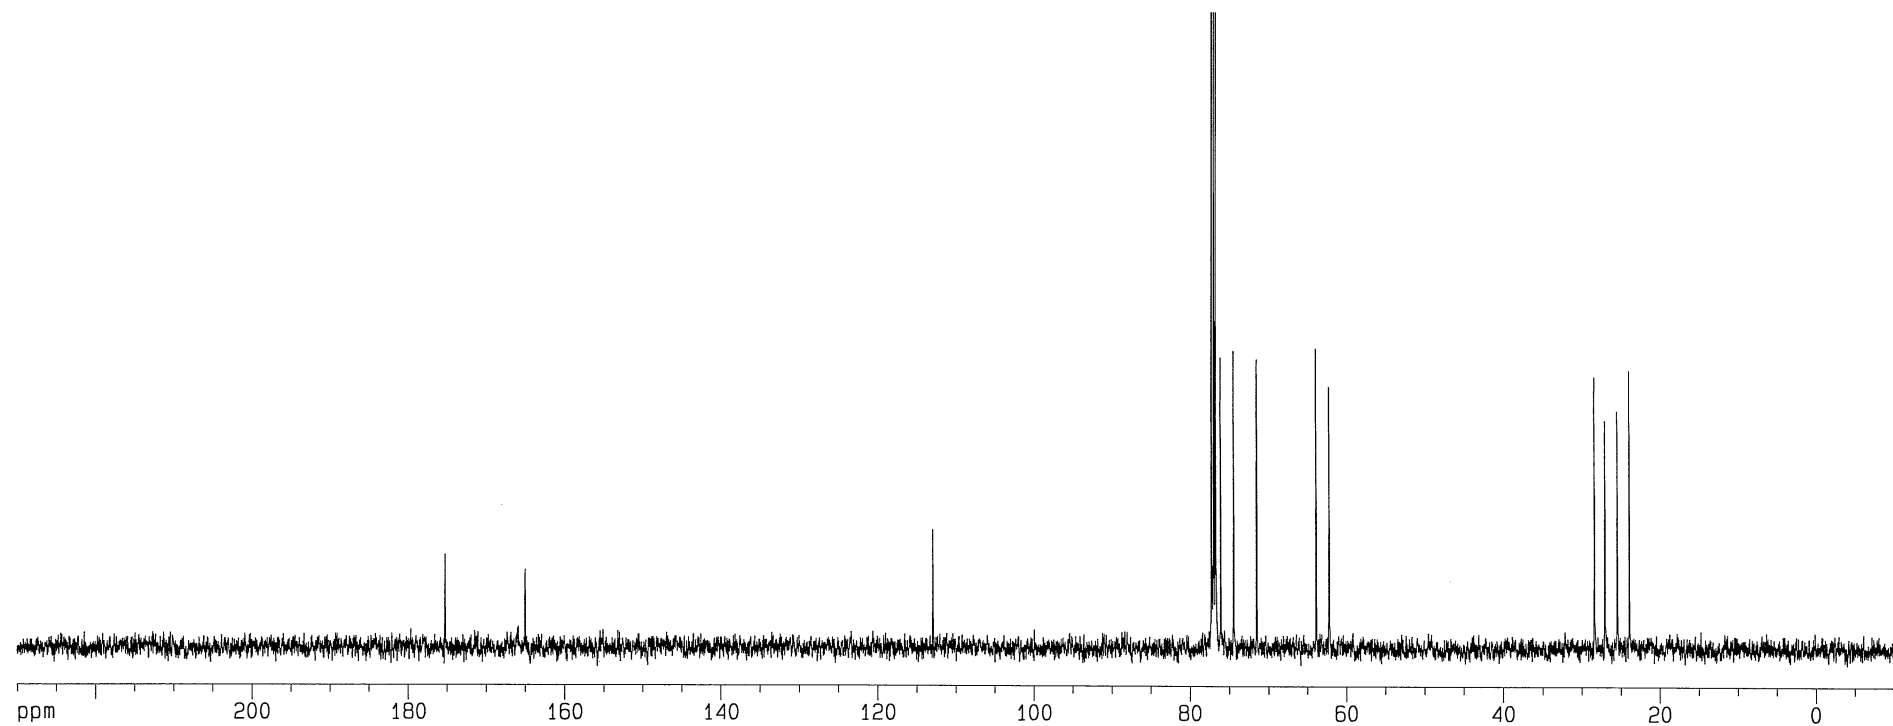

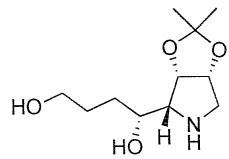

14

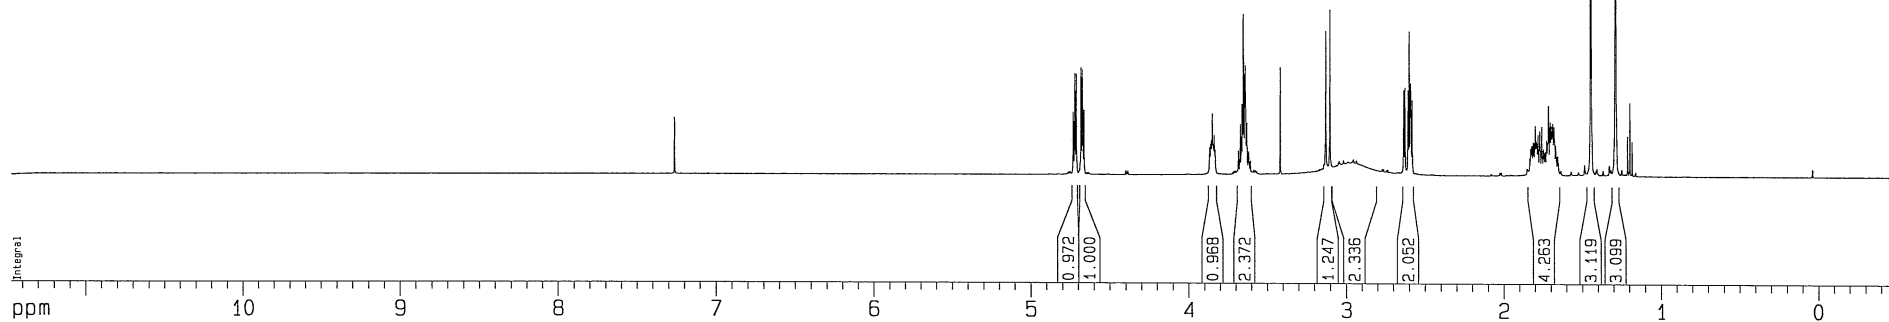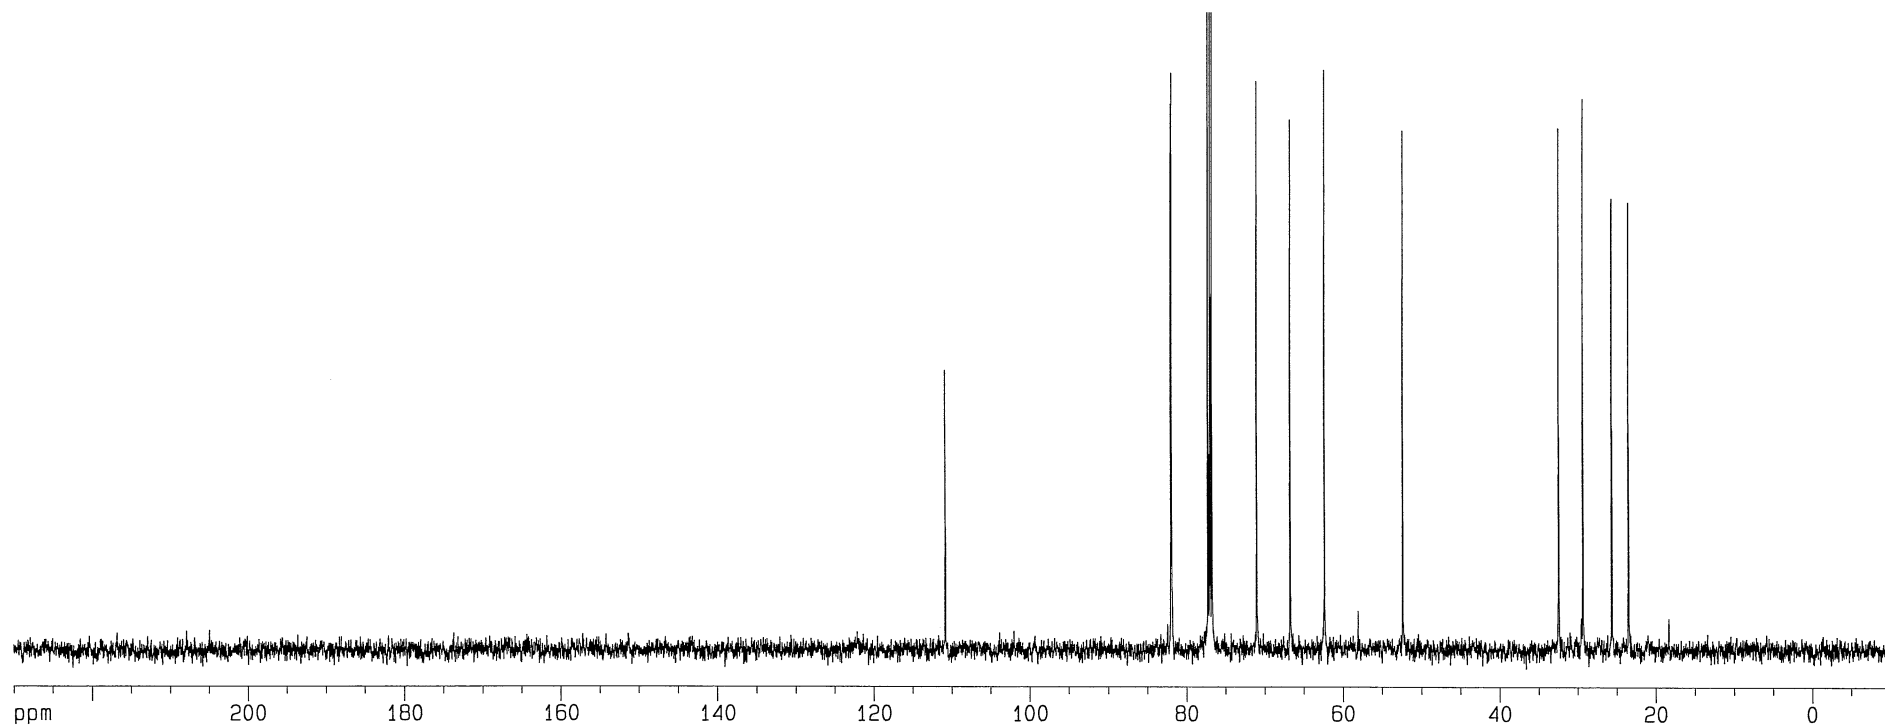

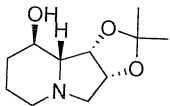

15

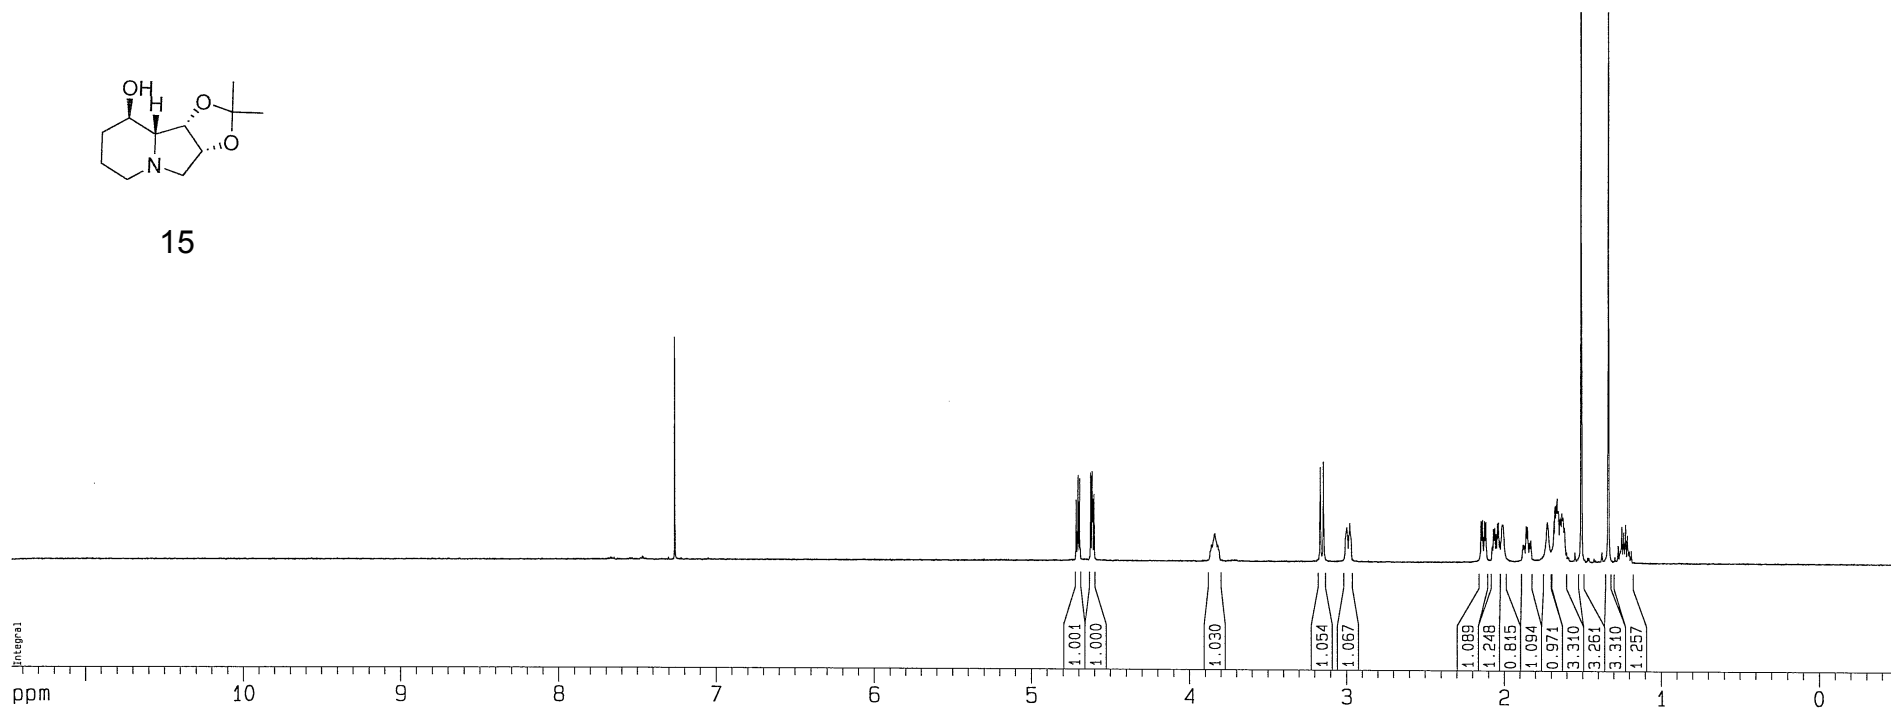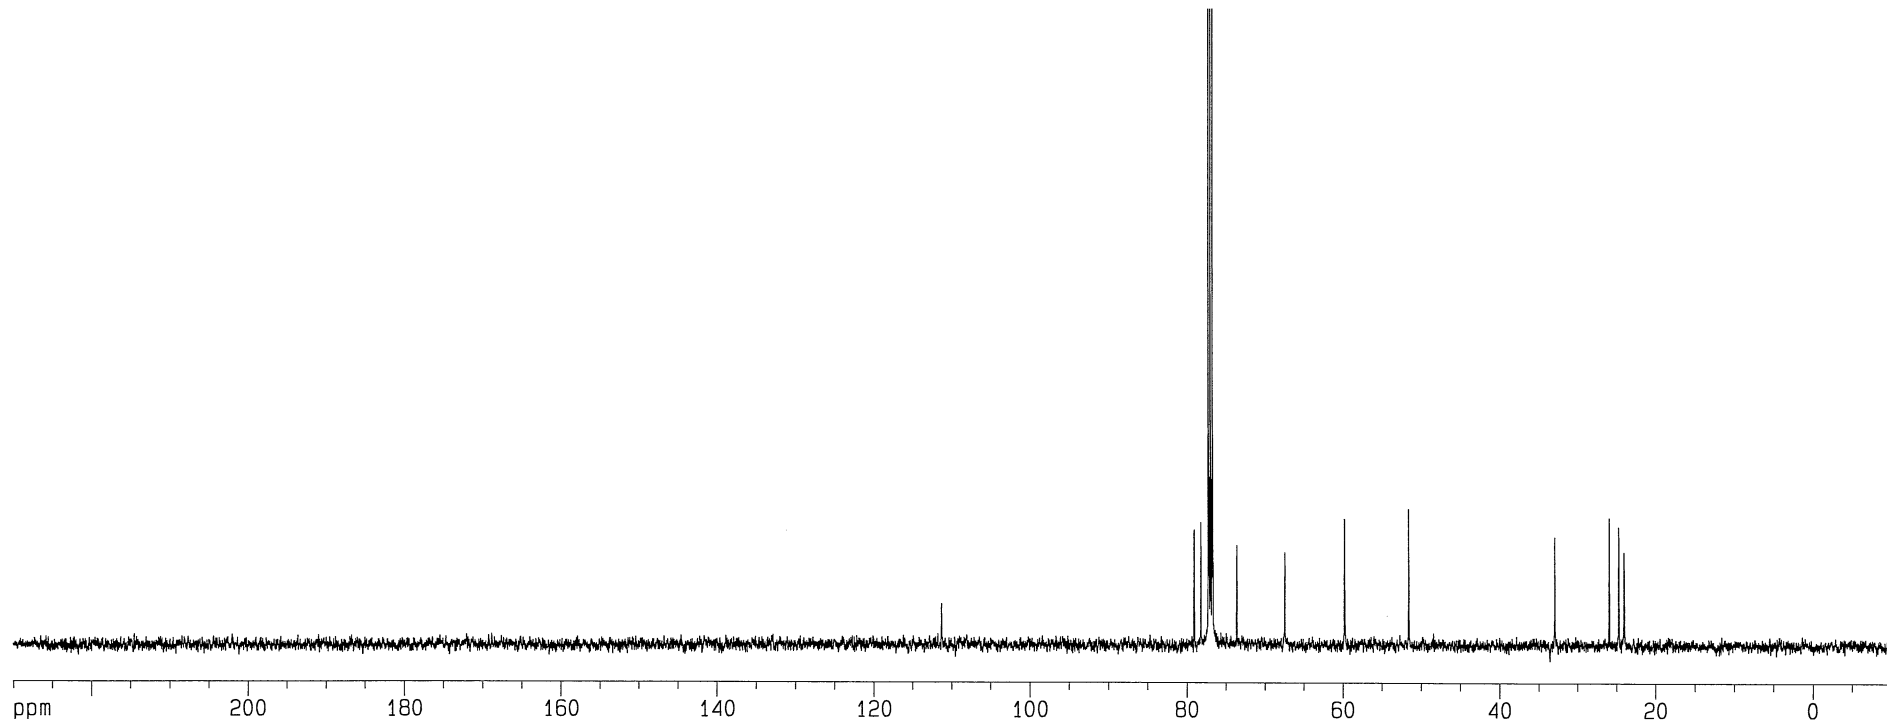

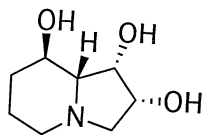

1

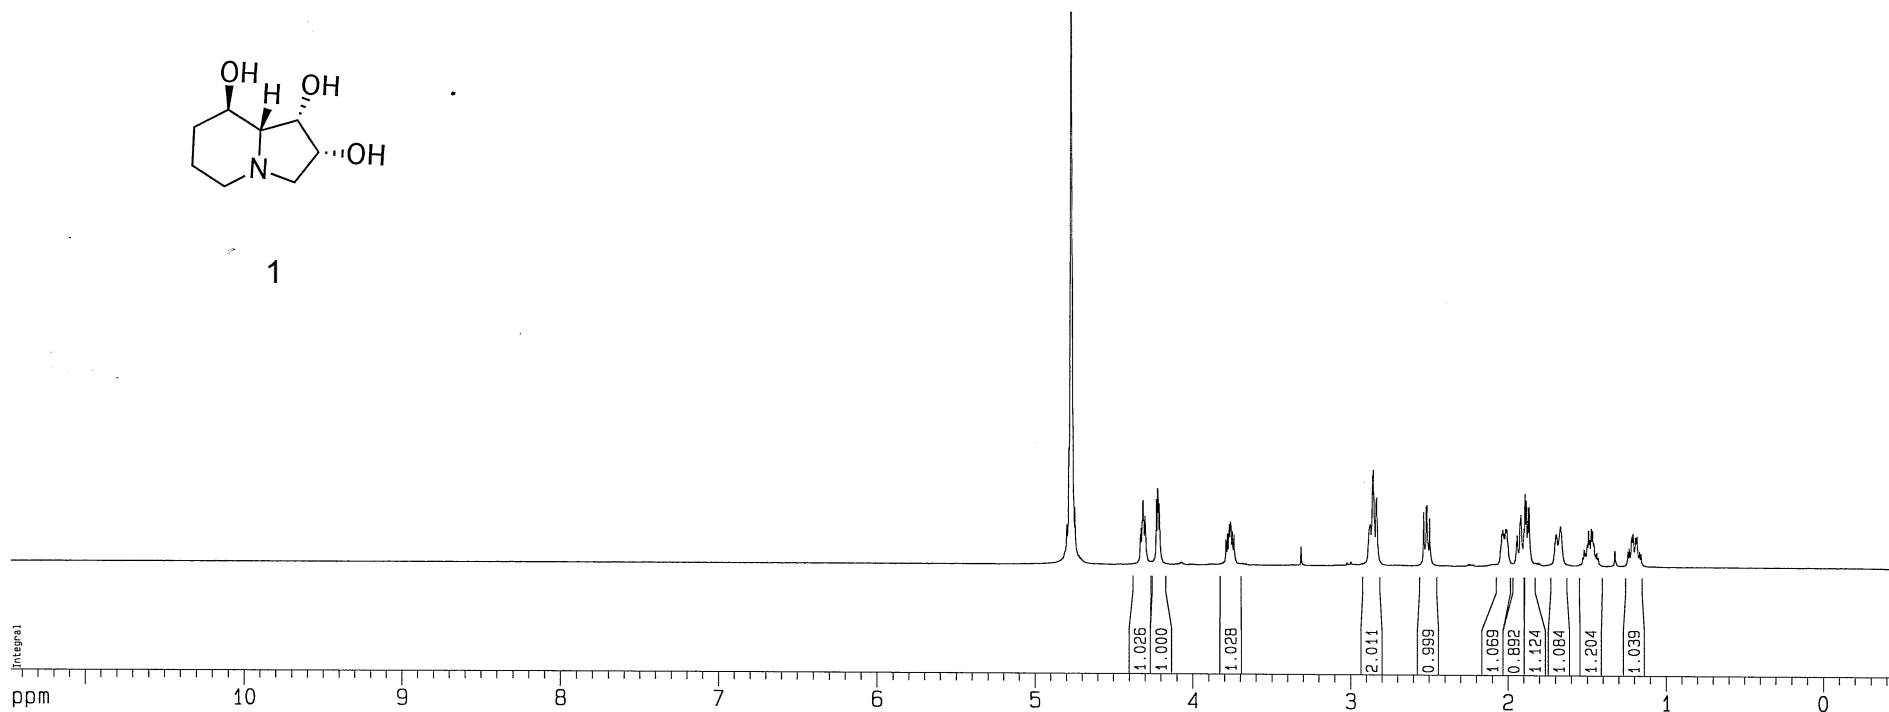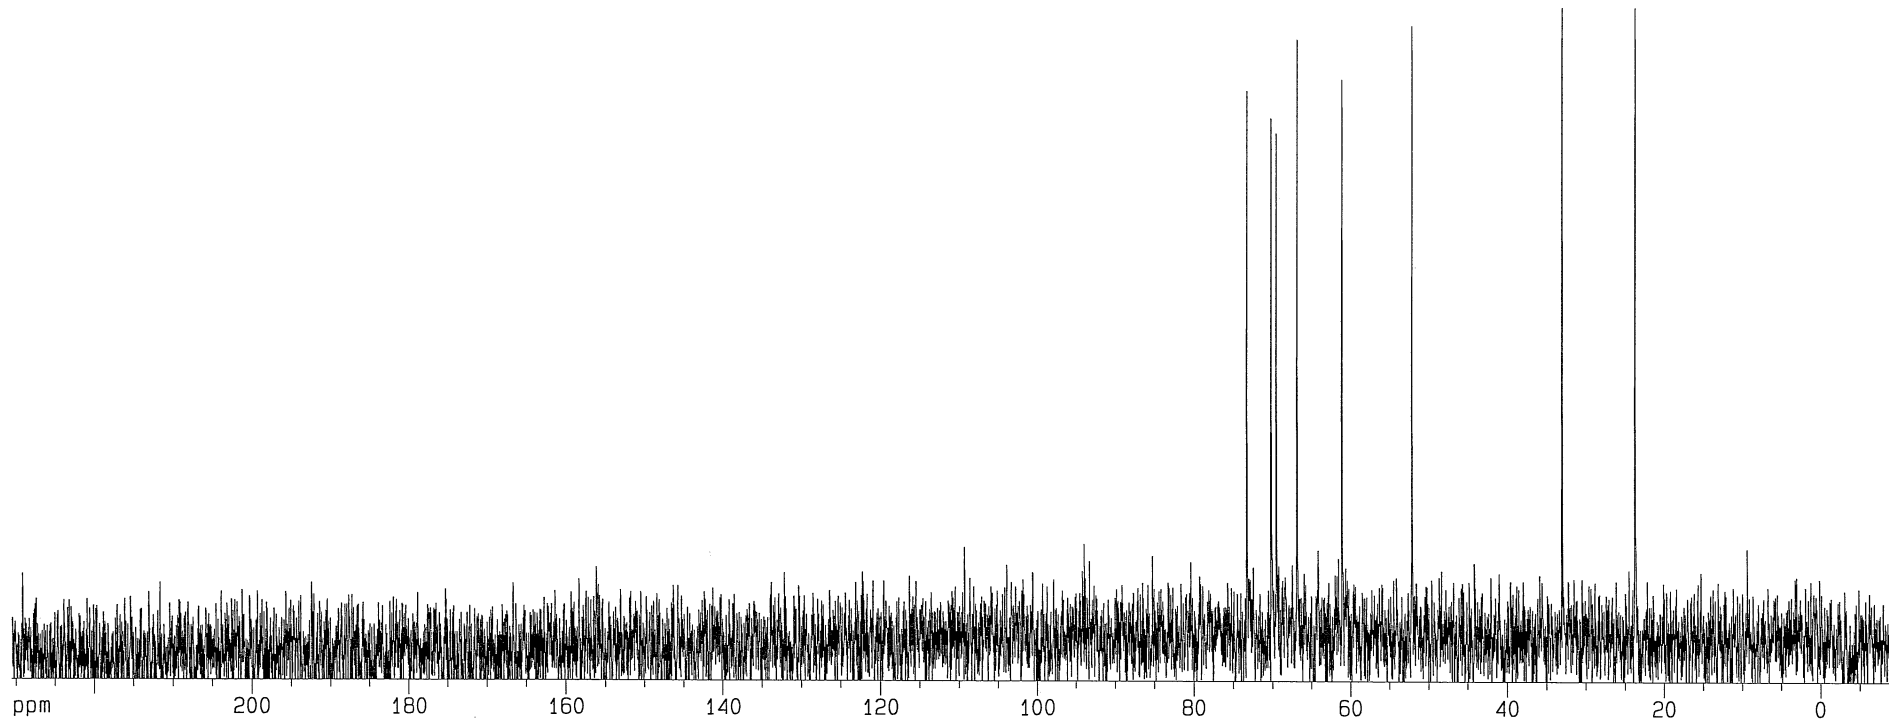

Supplement: NIHMS288601-supplement-2_si_002.pdf [file NIHMS288601-supplement-2_si_002.pdf]
